# Supplementary material
Source: HighWire-hosted journal article supplement (https://sti.bmj.com/content/sextrans-2017-053336)
Supplement: inline-supplementary-material-1 [file inline-supplementary-material-1.docx]

**Supplementary Table S1.** Biological and behavioral parameters of the HIV/HSV-2 model used in this study.[1]

| **Parameter** | **Value** | **Source** |
| --- | --- | --- |
| Probability of HSV-2 transmission per coital act per HSV-2 stage |  |  |
| *Primary infection* | 0.0189 | Published evidence[2] |
| *Latent infection* | 0.0 | Published evidence[2] |
| *Reactivation* | 0.0189 | Published evidence[2] |
| Shedding frequency of HSV-2 | 14% | Published evidence[2 3] |
| HSV-2 stage duration |  |  |
| *Primary infection* | 20.0 days | Published evidence[2] |
| *Latent infection* | 78.5 days | Published evidence[2] |
| *Reactivation* | 12.8 days | Published evidence[2] |
| Probability of HIV transmission per coital act per HIV stage |  |  |
| *Acute* | 0.0360 | Published evidence[4-6] |
| *Chronic* | 0.0008 | Published evidence[4 7] |
| *Advanced* | 0.0042 | Published evidence[4 7] |
| HIV stage duration |  |  |
| *Acute* | 49 days | Published evidence[4 5 7] |
| *Chronic* | 9.0 years | Published evidence[7-9] |
| *Advanced* | 2.0 years | Published evidence[4 7] |
| Frequency of coital acts per HSV-2 stage |  |  |
| *All stages* | 11.0 per month | Published evidence[4] |
| Frequency of coital acts per HIV stage |  |  |
| *Acute* | 10.6 per month | Published evidence[4] |
| *Latent* | 11.0 per month | Published evidence[4] |
| *Late* | 10.6 per month | Published evidence[4] |
| Marital partnership mean duration | 20 years | Representative value informed by DHS data[10] |
| Marriage rate | 0.12 | Estimated from Kenya’s 2008-2009 DHS data[10] |
| Non-marital (casual) sexual partnership mean duration | 6 months | Informed by previous work and Representative value[11 12] |
| Number of premarital sex partners among unmarried individuals over the last year |  | Derived based on DHS data[13] |
| *Mean* | 0.32 and a range of 0.0-1.0 |
| *Variance* | 0.0087 and a range of 0.0-2.0 |
| Number of extramarital sex partners among married individuals over the last year |  | Derived based on DHS data[13] |
| *Mean* | 0.0088 and a range of 0.0-0.5 |
| *Variance* | 0.0 with a range of 0.0-1.0 |
| DHS: Demographic and Health Survey |  |  |

**References**

1. Omori R, Abu-Raddad LJ. Sexual network drivers of HIV and herpes simplex virus type 2 transmission. AIDS 2017;**31**(12):1721-32 doi: 10.1097/QAD.0000000000001542[published Online First: Epub Date]|.

2. Abu-Raddad LJ, Magaret AS, Celum C, et al. Genital herpes has played a more important role than any other sexually transmitted infection in driving HIV prevalence in Africa. PLOS ONE 2008;**3**(5):e2230 doi: 10.1371/journal.pone.0002230[published Online First: Epub Date]|.

3. Mark KE, Wald A, Magaret AS, et al. Rapidly cleared episodes of herpes simplex virus reactivation in immunocompetent adults. J Infect Dis 2008;**198**(8):1141-9 doi: 10.1086/591913[published Online First: Epub Date]|.

4. Wawer MJ, Gray RH, Sewankambo NK, et al. Rates of HIV-1 transmission per coital act, by stage of HIV-1 infection, in Rakai, Uganda. J Infect Dis 2005;**191**(9):1403-9 doi: 10.1086/429411[published Online First: Epub Date]|.

5. Pinkerton SD. Probability of HIV transmission during acute infection in Rakai, Uganda. AIDS Behav 2008;**12**(5):677-84 doi: 10.1007/s10461-007-9329-1[published Online First: Epub Date]|.

6. Hollingsworth TD, Anderson RM, Fraser C. HIV-1 transmission, by stage of infection. J Infect Dis 2008;**198**(5):687-93 doi: 10.1086/590501[published Online First: Epub Date]|.

7. Abu-Raddad LJ, Longini IM, Jr. No HIV stage is dominant in driving the HIV epidemic in sub-Saharan Africa. AIDS 2008;**22**(9):1055-61 doi: 10.1097/QAD.0b013e3282f8af84[published Online First: Epub Date]|.

8. Morgan D, Whitworth J. The natural history of HIV-1 infection in Africa. Nat Med 2001;**7**(2):143-5

9. UNAIDS. UNAIDS Reference Group on Estimates, Modelling and Projections. 2007

10. MEASURE DHS. Demographic and health surveys. Secondary Demographic and health surveys. <http://www.measuredhs.com/>.

11. Abu-Raddad LJ, Longini Jr IM. No HIV stage is dominant in driving the HIV epidemic in sub-Saharan Africa. Aids 2008;**22**(9):1055-61

12. Awad SF, Abu-Raddad LJ. Could there have been substantial declines in sexual risk behavior across sub-Saharan Africa in the mid-1990s? Epidemics 2014;**8**(0):9-17 doi: [http://dx.doi.org/10.1016/j.epidem.2014.06.001[published](http://dx.doi.org/10.1016/j.epidem.2014.06.001%5bpublished) Online First: Epub Date]|.

13. Omori R, Chemaitelly H, Abu-Raddad LJ. Dynamics of non-cohabiting sex partnering in sub-Saharan Africa: a modelling study with implications for HIV transmission. Sex Transm Infect 2015;**91**(6):451-7 doi: 10.1136/sextrans-2014-051925[published Online First: Epub Date]|.
